# Supplementary material for: Magnesium complexes containing biphenyl-based tridentate imino-phenolate ligands for ring-opening polymerization of rac-lactide and α-methyltrimethylene carbonate
Source: Royal Society of Chemistry journal article supplement (doi:10.1039/c3dt53513d), 2014-01-01
Supplement: c3dt53513d.pdf [file c3dt53513d.pdf]

Supporting Information

**Magnesium Complexes Containing Biphenyl-based Tridentate  
Iminophenolate Ligands for Ring-Opening Polymerization of  
*rac*-Lactide and  $\alpha$ -Methyltrimethylene Carbonate**

Wei Yi and Haiyan Ma\*

*Shanghai Key Laboratory of Functional Materials Chemistry and Laboratory of  
Organometallic Chemistry, East China University of Science and Technology, 130  
Meilong Road, Shanghai 200237, P. R. China.*

Haiyan Ma: [haiyanma@ecust.edu.cn](mailto:haiyanma@ecust.edu.cn)

\* To whom correspondence should be addressed. Tel./Fax: +86 21 64253519. E-mail:

[haiyanma@ecust.edu.cn](mailto:haiyanma@ecust.edu.cn).

## Contents:

**Table S1.** The chemical shifts of dimethylamino resonances in the  $^1\text{H}$  NMR spectra of magnesium complexes and corresponding proligands

**Figure S1.** A)  $^1\text{H}$  NMR trace spectrum of reaction between complex **2** and one equiv. of 2-propanol; B)  $^1\text{H}$  NMR spectrum of free ligand  $\text{L}^2\text{H}$ ; C)  $^1\text{H}$  NMR spectrum of complex **2**.

**Figure S2.**  $^1\text{H}$  NMR spectrum of *rac*-lactide oligomer obtained by complex **2**/ $i$ PrOH system in  $\text{CDCl}_3$ .

**Figure S3.** Homonuclear decoupled  $^1\text{H}$  NMR spectrum of PLA produced from *rac*-lactide using **3** as initiator at 25 °C.

**Figure S4.** Homonuclear decoupled  $^1\text{H}$  NMR spectrum of PLA produced from *rac*-lactide using **3** as initiator at -38 °C.

**Figure S5.**  $^1\text{H}$  NMR spectrum of active  $\alpha$ -MeTMC oligomer by **2**/ $i$ PrOH.

**Figure S6.** The DSC curve of poly( $\alpha$ -MeTMC) produced from  $\alpha$ -MeTMC using **1** as initiator.

**Figure S7.** The DSC curve of poly( $\alpha$ -MeTMC) produced from  $\alpha$ -MeTMC using **2** as initiator.

**Figure S8.** The DSC curve of poly( $\alpha$ -MeTMC) produced from  $\alpha$ -MeTMC using **3** as initiator.

**Figure S9.** The DSC curve of poly( $\alpha$ -MeTMC) produced from  $\alpha$ -MeTMC using **4** as initiator.

**Table S1.** The chemical shifts of dimethyl amino resonances in the  $^1\text{H}$  NMR spectra of magnesium complexes and corresponding proligands <sup>a</sup>

| Complex  | Ar-N(CH <sub>3</sub> ) <sub>2</sub> |                                                     | Ligand                | Ar-N(CH <sub>3</sub> ) <sub>2</sub> |
|----------|-------------------------------------|-----------------------------------------------------|-----------------------|-------------------------------------|
|          | C <sub>6</sub> D <sub>6</sub>       | C <sub>6</sub> D <sub>6</sub> with THF <sup>b</sup> |                       | C <sub>6</sub> D <sub>6</sub>       |
| <b>1</b> | --                                  | 2.22 (s) <sup>c</sup>                               | <b>L<sup>1</sup>H</b> | 2.37                                |
| <b>2</b> | 2.22 (br)                           | 2.10 (s)                                            | <b>L<sup>2</sup>H</b> | 2.21                                |
| <b>3</b> | --                                  | 2.23 (s) <sup>c</sup>                               | <b>L<sup>3</sup>H</b> | 2.17                                |
| <b>4</b> | 2.55 (br)                           | 2.10 (s)                                            | <b>L<sup>4</sup>H</b> | 2.32                                |

<sup>a</sup>: In ppm; <sup>b</sup>: One tiny drop of THF was added to the solution of magnesium complex

in C<sub>6</sub>D<sub>6</sub>; <sup>c</sup>: The corresponding resonance of complexes **1** and **3** in C<sub>6</sub>D<sub>6</sub>.

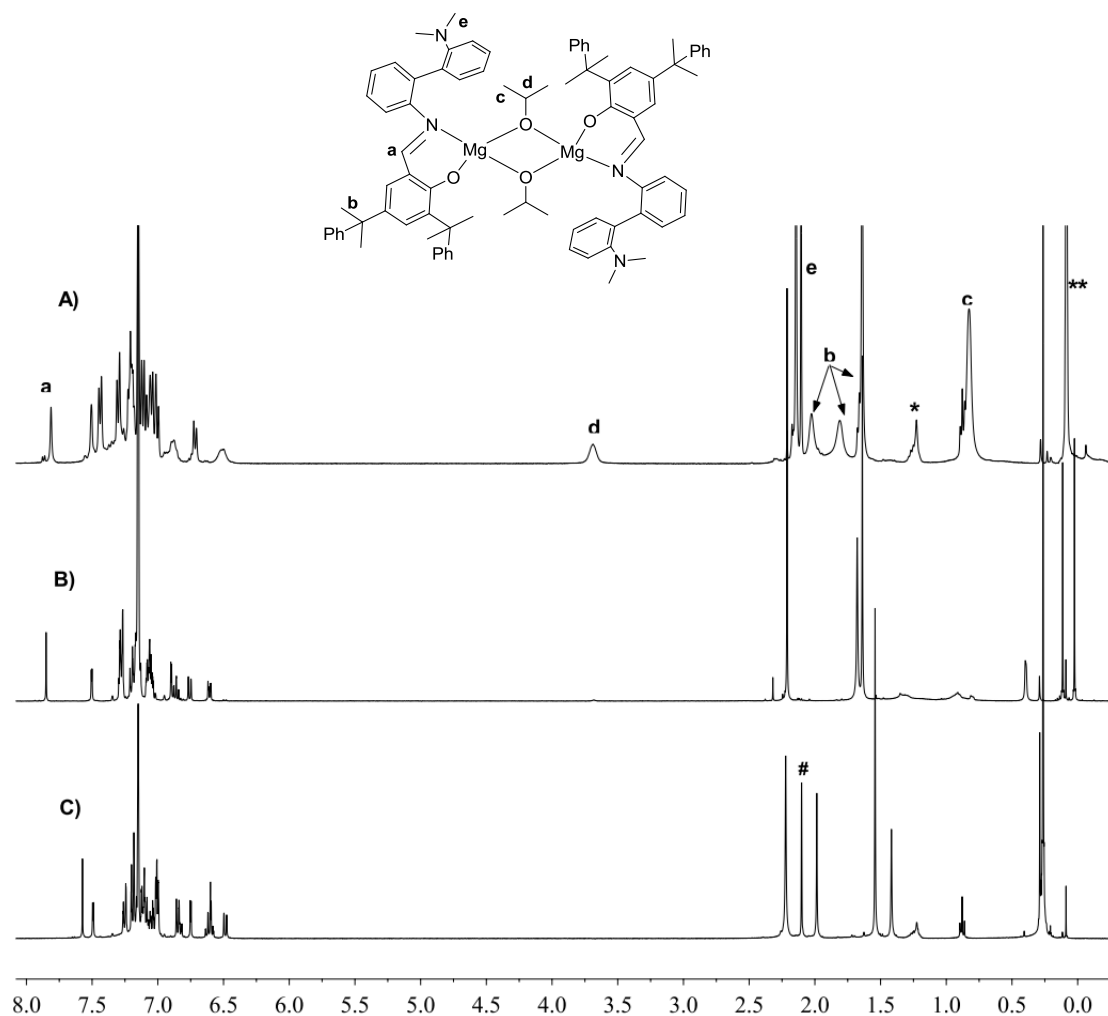

**Figure S1.** A)  $^1\text{H}$  NMR trace spectrum of reaction between complex **2** and one equiv. of 2-propanol; B)  $^1\text{H}$  NMR spectrum of free ligand  $\text{L}^2\text{H}$ ; C)  $^1\text{H}$  NMR spectrum of complex **2** ( $\text{C}_6\text{D}_6$ , 400 MHz, \*, hexane; \*\*,  $\text{HN}(\text{SiMe}_3)_2$ ; #, methyl signal of toluene)

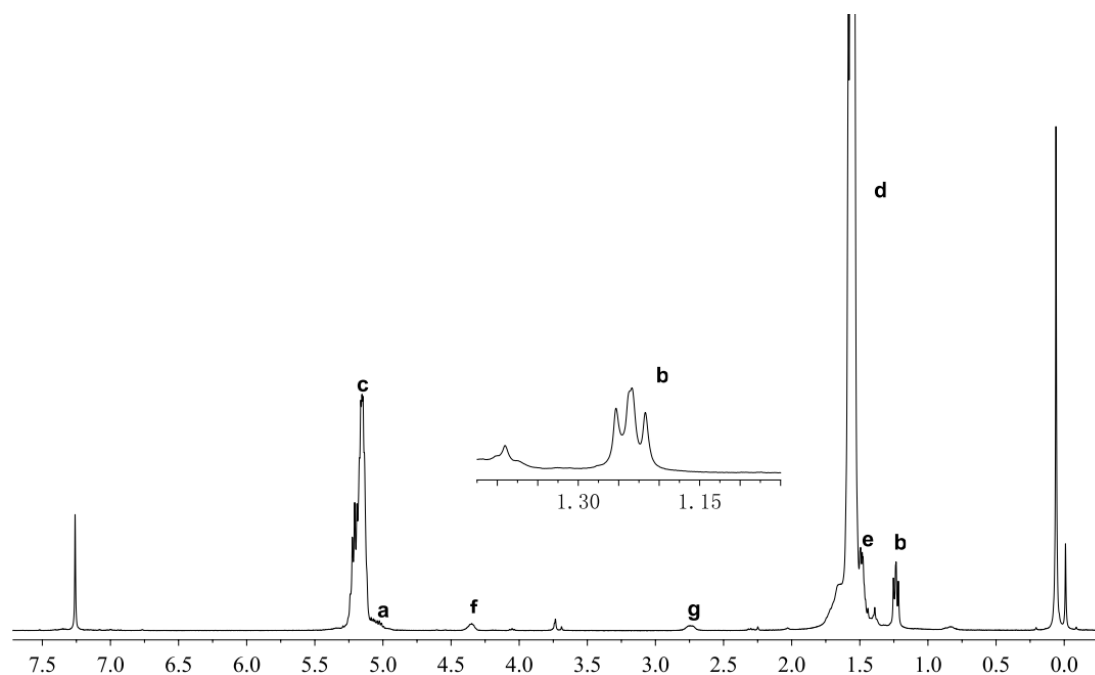

**Figure S2.**  $^1\text{H}$  NMR spectrum of *rac*-lactide oligomer obtained by complex **2**/*i*PrOH system ( $[\textit{rac}\text{-LA}]_0 : [\text{Mg}]_0 : [\textit{iPrOH}]_0 = 20:1:1$ , at 25 °C) in  $\text{CDCl}_3$ .

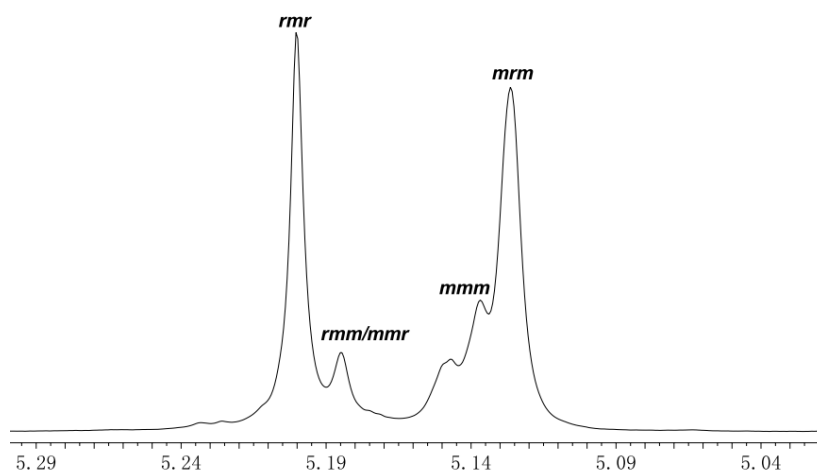

**Figure S3.** Homonuclear decoupled  $^1\text{H}$  NMR spectrum of PLA produced from *rac*-lactide using **3** as initiator. ( $[\textit{rac}\text{-LA}]_0 = 1\text{ M}$ ,  $[\mathbf{3}] = [\textit{iPrOH}] = 0.5\text{ mM}$ , 94% monomer conv., in THF, 25 °C,  $P_r = 0.77$ .)

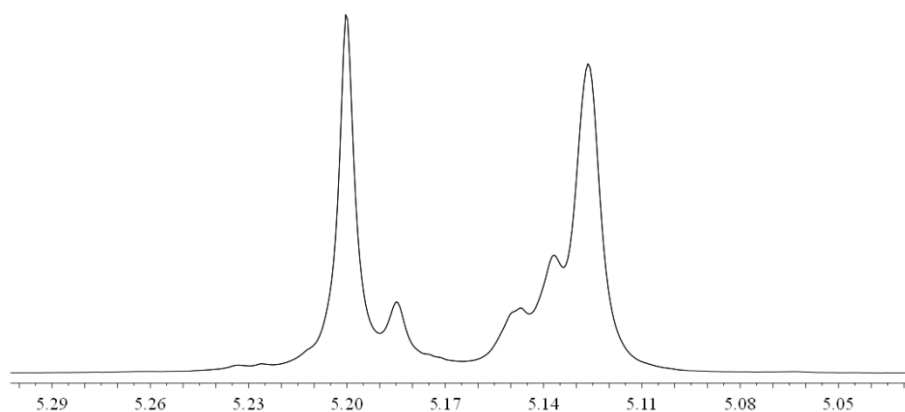

**Figure S4.** Homonuclear decoupled <sup>1</sup>H NMR spectrum of PLA produced from *rac*-lactide using **3** as initiator. ( $[rac\text{-LA}]_0 = 1\text{ M}$ ,  $[\mathbf{3}] = [i\text{PrOH}] = 0.5\text{ mM}$ , 73% monomer conv., in THF,  $-38\text{ }^{\circ}\text{C}$ ,  $P_r = 0.81$ .)

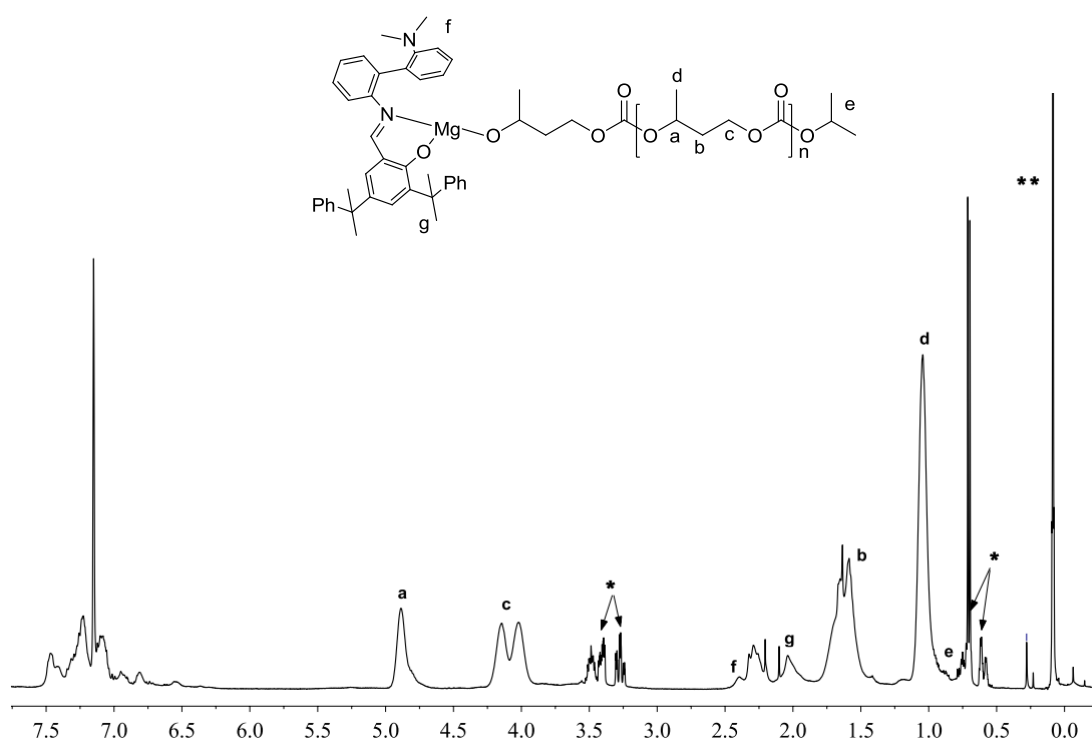

**Figure S5.**  $^1\text{H}$  NMR spectrum of active  $\alpha$ -MeTMC oligomer by  $2/i\text{PrOH}$  ( $[\alpha\text{-MeTMC}]_0 : [\text{Mg}]_0 : [i\text{PrOH}]_0 = 20:1:1$ ;  $20^\circ\text{C}$ ,  $\text{C}_6\text{D}_6$ , 400 MHz; \*, monomer; \*\*, free  $\text{HN}(\text{SiMe}_3)_2$ ).

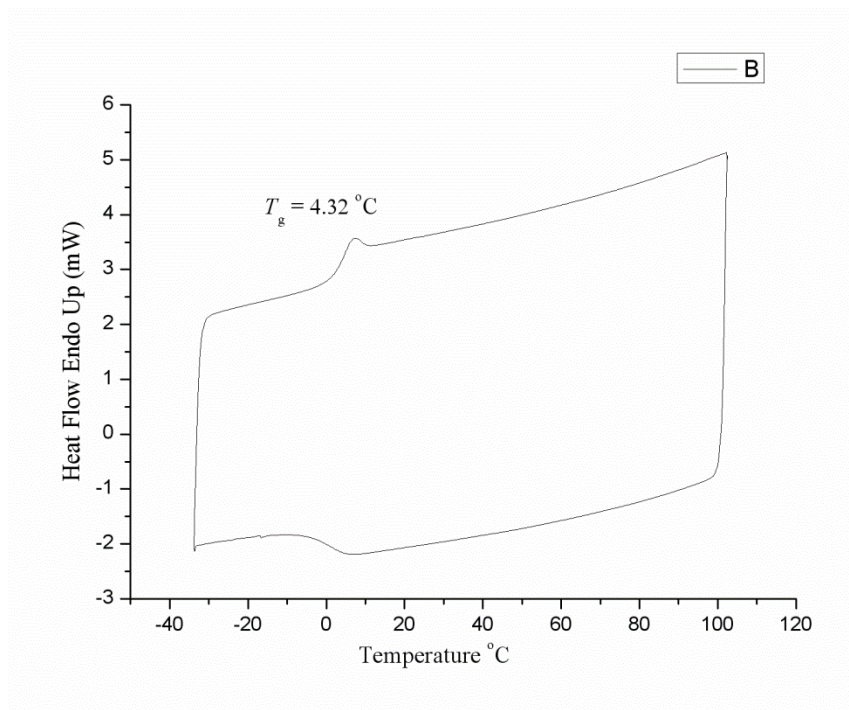

**Figure S6.** The DSC curves of poly( $\alpha$ -MeTMC) produced from  $\alpha$ -MeTMC using **1** as initiator. ( $[\alpha\text{-MeTMC}]_0 = 1\text{ M}$ ,  $[\mathbf{1}] = 0.5\text{ mM}$ , 90% monomer conv., in toluene, 70 °C,  $T_g = 4.32\text{ °C}$ .)

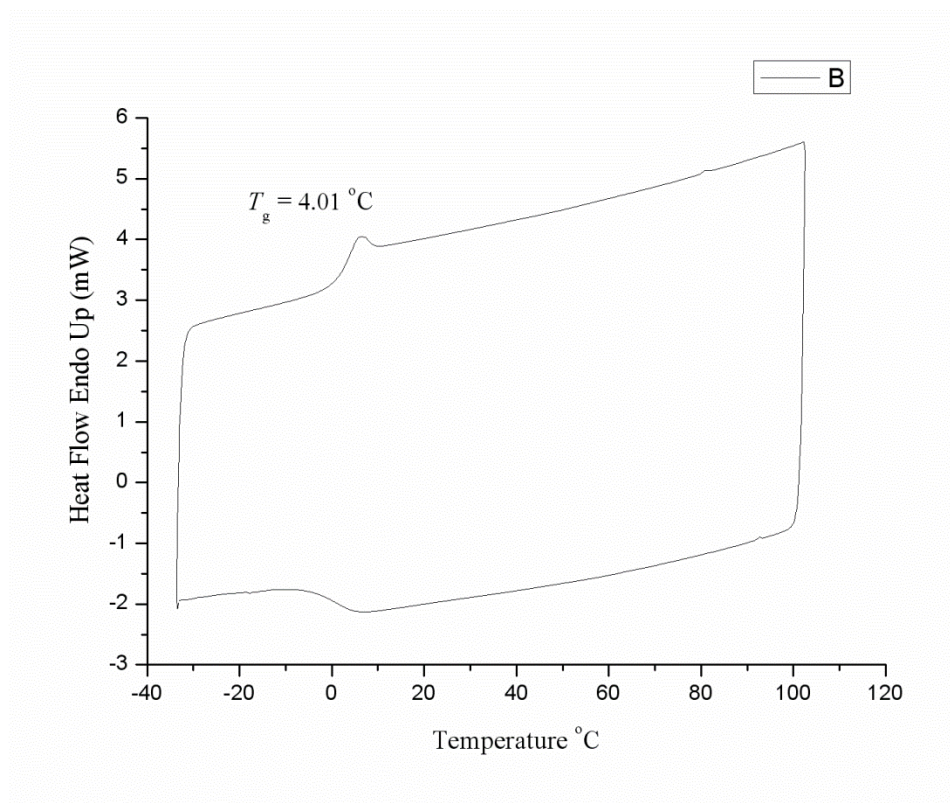

**Figure S7.** The DSC curves of poly( $\alpha$ -MeTMC) produced from  $\alpha$ -MeTMC using **2** as initiator. ( $[\alpha\text{-MeTMC}]_0 = 1\text{ M}$ ,  $[\mathbf{2}] = 0.5\text{ mM}$ , 90% monomer conv., in toluene, 70 °C,  $T_g = 4.01\text{ °C}$ .)

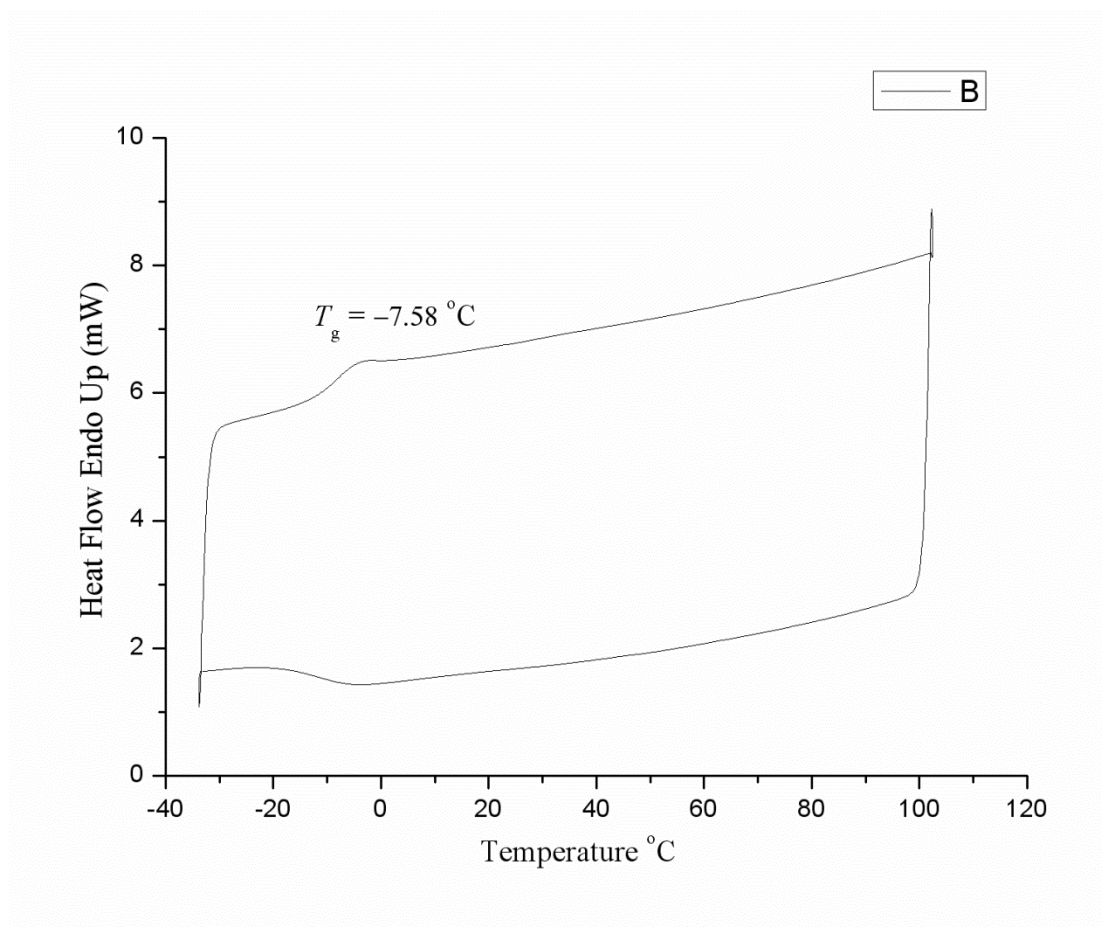

**Figure S8.** The DSC curves of poly( $\alpha$ -MeTMC) produced from  $\alpha$ -MeTMC using **3** as initiator. ( $[\alpha\text{-MeTMC}]_0 = 1\text{ M}$ ,  $[\mathbf{3}] = 0.5\text{ mM}$ , 92% monomer conv., in toluene, 70 °C,  $T_g = -7.58\text{ °C}$ .)

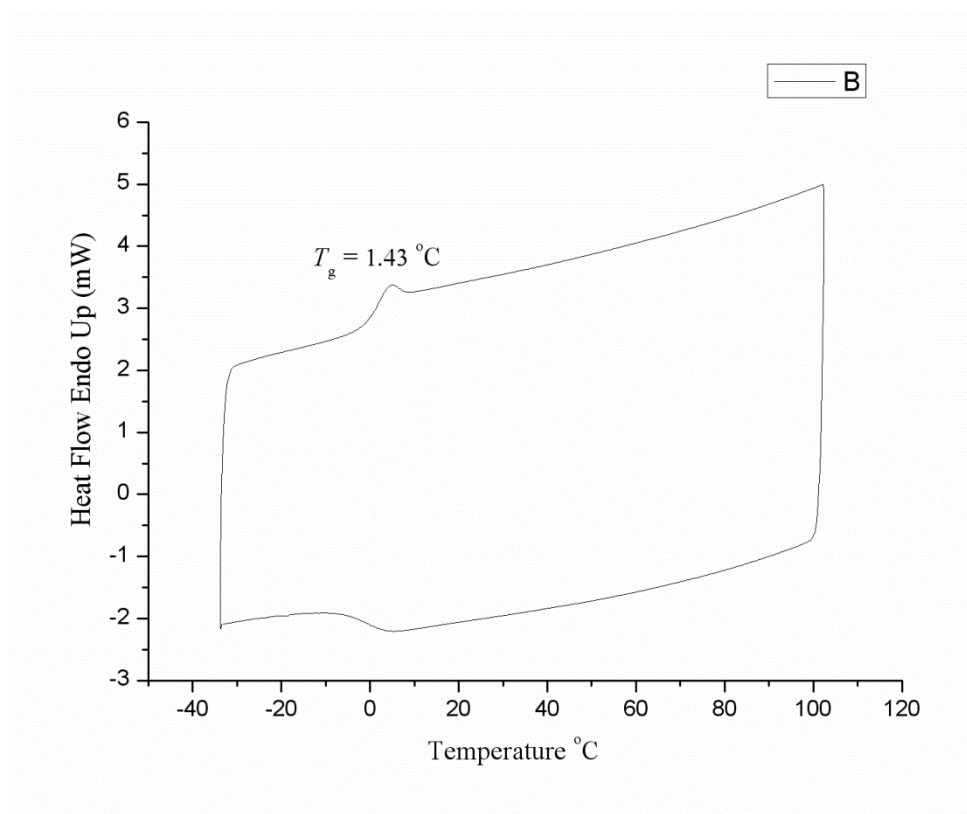

**Figure S9.** The DSC curves of poly( $\alpha$ -MeTMC) produced from  $\alpha$ -MeTMC using **4** as initiator. ( $[\alpha\text{-MeTMC}]_0 = 1\text{ M}$ ,  $[\mathbf{4}] = 0.5\text{ mM}$ , 88% monomer conv., in toluene, 70 °C,  $T_g = 1.43\text{ °C}$ .)
